# Supplementary material
Source: Springer Nature journal article supplement (https://www.springermedizin.de/resource/supplementary/12993_2009_237_MOESM3_ESM.pdf/9617356)

# "Hamilton Depression Rating Scale" score

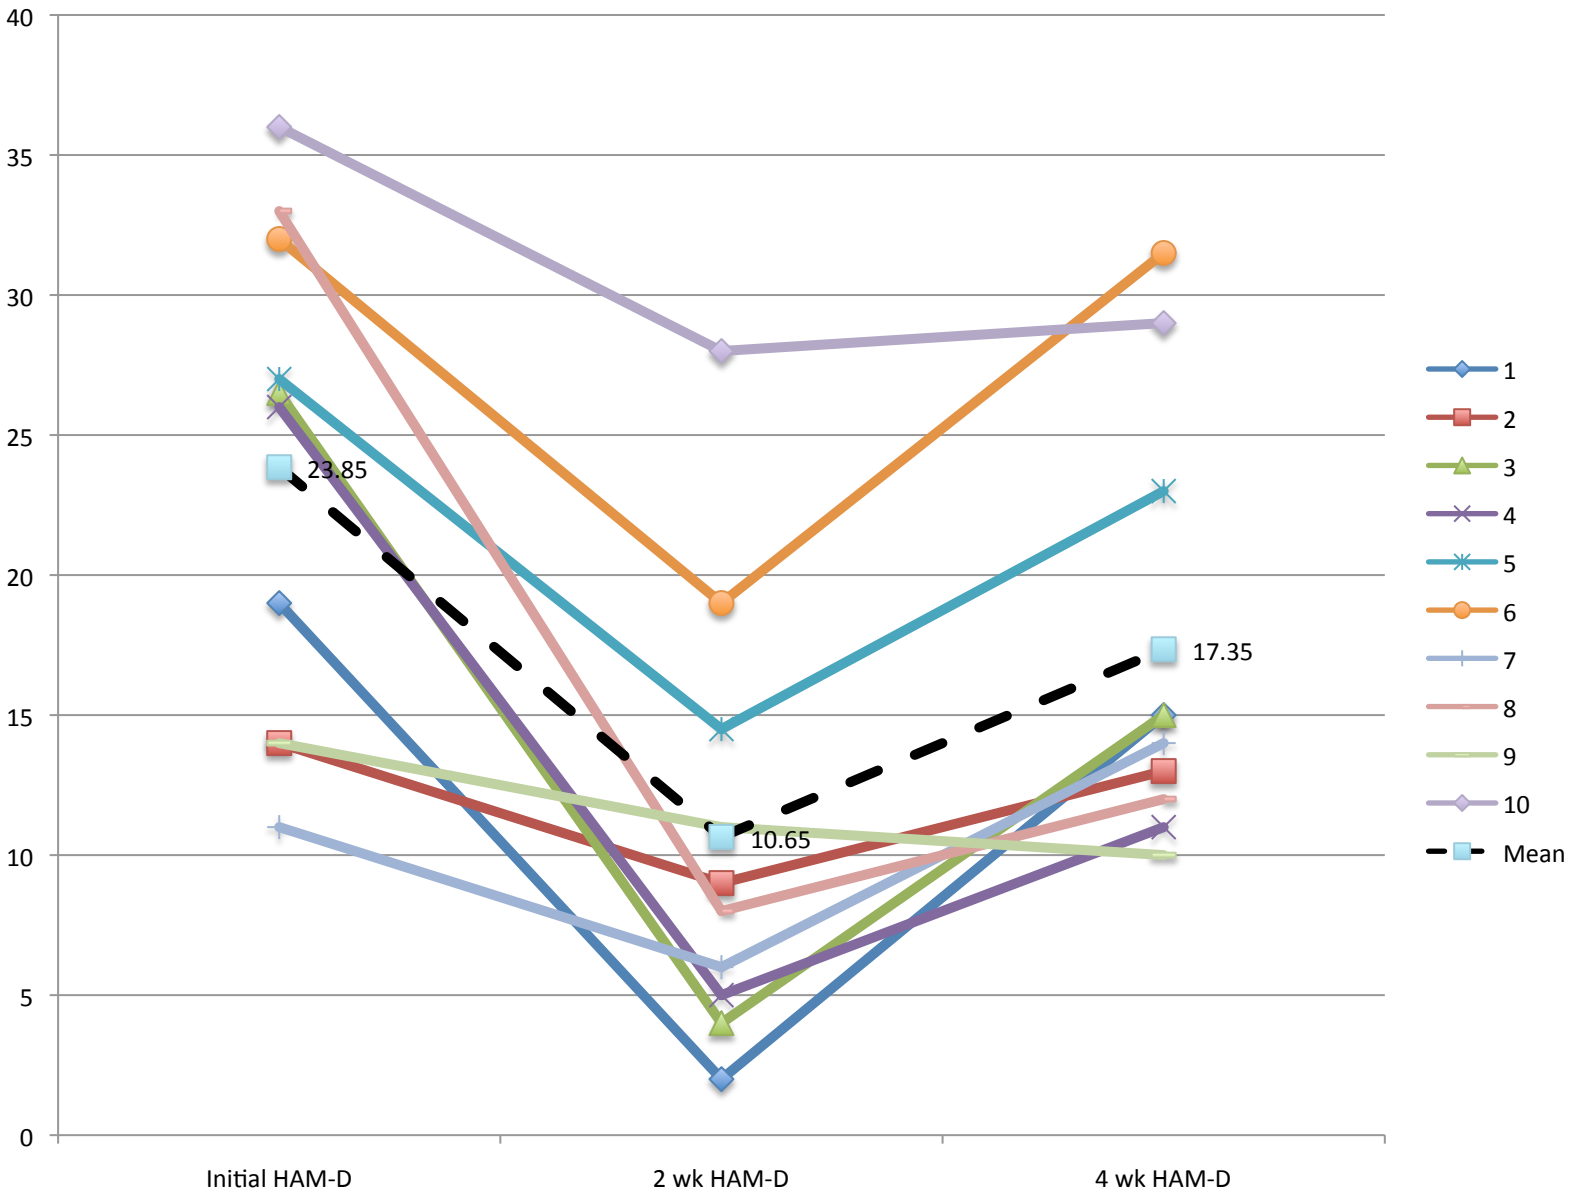

Supplement: MOESM3 [file 9617356]
